# Supplementary material for: Suicide attempts in U.S. Army combat arms, special forces and combat medics
Source: Springer Nature journal article supplement (doi:10.1186/s12888-017-1350-y), 2017-05-25
Supplement: MOESM1 [file 12315862]

**Additional File 1:  
Supplemental Tables and Information**

**Table S1. List and Brief Descriptions of Administrative Data Systems Included in the 2004-2009 Army STARRS Historical Administrative Data Study (HADS).**

| <b>Database Acronym</b>                        | <b>Description</b>                                                                                                                                                                                                                                                                                                                                                                                                                                                                                                                                                                                                                                                                                                                                                                                                                                                                                                                                    |
|------------------------------------------------|-------------------------------------------------------------------------------------------------------------------------------------------------------------------------------------------------------------------------------------------------------------------------------------------------------------------------------------------------------------------------------------------------------------------------------------------------------------------------------------------------------------------------------------------------------------------------------------------------------------------------------------------------------------------------------------------------------------------------------------------------------------------------------------------------------------------------------------------------------------------------------------------------------------------------------------------------------|
| AFMETS                                         | ARMED FORCES MEDICAL EXAMINER TRACKING SYSTEM (AFMETS): Variables include manner of death and cause of death, including self-inflicted.                                                                                                                                                                                                                                                                                                                                                                                                                                                                                                                                                                                                                                                                                                                                                                                                               |
| DCIPS                                          | DEFENSE CASUALTY INFORMATION PROCESSING SYSTEM (DCIPS): Casualty data system for Army, Navy, Air Force, and Marines. It contains information on all casualties including deceased active duty members (and cause of death).                                                                                                                                                                                                                                                                                                                                                                                                                                                                                                                                                                                                                                                                                                                           |
| DMDC/CTS                                       | DEFENSE MANPOWER DATA CENTER (DMDC) / CONTINGENCY TRACKING SYSTEM (CTS): Collection of activation, mobilization, and deployment data. Provides information to DoD decision makers and includes a CTS Deployment File used for tracking the location of deployed personnel.                                                                                                                                                                                                                                                                                                                                                                                                                                                                                                                                                                                                                                                                            |
| DMDC/Master Personnel & DMDC/Transaction files | DEFENSE MANPOWER DATA CENTER (DMDC) / MASTER PERSONNEL & TRANSACTION FILES: The Active Duty Master File provides an inventory of all individuals on active duty (excluding reservists on active duty for training) at a point in time. It is a standardized and centralized database of present and past members of the active duty force. Personal data elements include social security number, education level, home of record, date of birth, marital status, number of dependents, race, ethnic group, and name. Military data elements include Service, pay grade, Armed Forces Qualification Test percentile (enlisted only), source of commission (officers only), military primary duty and secondary occupation, Unit Identification Code, months of service, duty location, Estimated Termination of Service date, basic active service date, date of current rank, pay entry base date, foreign language ability, and major command code. |
| DODSER                                         | DEPARTMENT OF DEFENSE SUICIDE EVENT REPORT (DODSER): Provides risk and protective factor information for suicide events. This file contains non-fatal attempts, completed suicides, and suicide ideation cases.                                                                                                                                                                                                                                                                                                                                                                                                                                                                                                                                                                                                                                                                                                                                       |
| MDR                                            | MILITARY HEALTH SYSTEM DATA REPOSITORY (MDR): This database contains information about medical, dental, pharmaceutical, and ancillary claims data for both in network and purchased care as well as both inpatient and outpatient treatment. Data are collected on both Army personnel and their beneficiaries.                                                                                                                                                                                                                                                                                                                                                                                                                                                                                                                                                                                                                                       |
| DMDC/DEERS                                     | DEFENSE MANPOWER DATA CENTER (DMDC) / DEFENSE ENROLLMENT ELIGIBILITY REPORTING SYSTEM (DEERS): A DoD PDR containing personnel data and data related to DoD affiliation, benefits, employment, and pay.                                                                                                                                                                                                                                                                                                                                                                                                                                                                                                                                                                                                                                                                                                                                                |
| TMDS                                           | THEATER MEDICAL DATA STORE (TMDS): Used to track, analyze, view and manage Soldier medical treatment information recorded in the theater of operations. Features of TMDS: accessibility and visibility of service members' deployed medical records, outpatient and inpatient treatment records created in theater facilities, treatment records from other applications, reports on movement of patients, patient status and injury/illnesses.                                                                                                                                                                                                                                                                                                                                                                                                                                                                                                       |
| TRAC2ES                                        | TRANSCOM REGULATING AND COMMAND AND CONTROL EVACUATION SYSTEM (TRAC2ES): A tracking system for all medical transfers across the world for all DOD services.                                                                                                                                                                                                                                                                                                                                                                                                                                                                                                                                                                                                                                                                                                                                                                                           |

**Table S2. List of Military Occupational Specialties (MOS) Included in the 2004-2009 Army STARRS Historical Administrative Data Study (HADS).**

**Combat Arms**

|      |                                  |
|------|----------------------------------|
| E11B | Infantryman                      |
| E11C | Indirect Fire Infantryman        |
| E11Z | Infantry Senior Sergeant         |
| E13B | Cannon Crewmember                |
| E13E | Cannon Fire Direction Specialist |
| E13F | Fire Support Specialist          |
| E13S | Field Artillery Surveyor         |
| E19D | Cavalry Scout                    |
| E19K | M1 Armor Crewman                 |
| E19Z | Armor Senior Sergeant            |

**Special Forces**

|      |                                                               |
|------|---------------------------------------------------------------|
| E00D | Special Duty Assignment                                       |
| E18B | Special Forces Weapons Sergeant                               |
| E18C | Special Forces Engineer Sergeant                              |
| E18E | Special Forces Communications Sergeant                        |
| E18F | Special Forces Assistant Operations and Intelligence Sergeant |
| E18Z | Special Forces Senior Sergeant                                |

**Combat Medic**

|      |                        |
|------|------------------------|
| E68W | Health Care Specialist |
| E91W | Health Care Specialist |

**All Other (i.e., not included in the Combat Arms, Special Forces, or Combat Medic categories above)**

Air Traffic Controller

|      |                                    |
|------|------------------------------------|
| E15P | Aviation Operations Specialist     |
| E15Q | Air Traffic Control (ATC) Operator |

Chaplains Assistant/Chaplain

|      |                    |
|------|--------------------|
| E56M | Chaplain Assistant |
|------|--------------------|

Combat Engineer

|      |                                    |
|------|------------------------------------|
| E12B | Combat Engineer                    |
| E12Z | Combat Engineering Senior Sergeant |
| E21B | Combat Engineer                    |
| E21Z | Combat Engineering Senior Sergeant |

Communication

|      |                                               |
|------|-----------------------------------------------|
| E25B | Information Technology Specialist             |
| E25C | Radio Operator-Maintainer                     |
| E25D | Telecommunications Operator-Maintainer        |
| E25E | Electromagnetic Spectrum Manager              |
| E25F | Network Switching Systems Operator-Maintainer |
| E25L | Cable Systems Installer-Maintainer            |
| E25M | Multimedia Illustrator                        |

|      |                                                       |
|------|-------------------------------------------------------|
| E25N | Nodal Network Systems Operator-Maintainer             |
| E25P | Microwave Systems Operator-Maintainer                 |
| E25Q | Multichannel Transmission Systems Operator-Maintainer |
| E25R | Visual Information Equipment Operator-Maintainer      |
| E25S | Satellite Communications Systems Operator-Maintainer  |
| E25T | Satellite/Microwave Systems Chief                     |
| E25U | Signal Support Systems Specialist                     |
| E25V | Combat Documentation/Production Specialist            |
| E25W | Telecommunications Operations Chief                   |
| E25Y | Information Systems Chief                             |
| E25Z | Visual Information Operations Chief                   |
| E31F | Network Switching Systems Operator-Maintainer         |
| E31L | Cable Systems Installer-Maintainer                    |
| E31P | Microwave Systems Operator-Maintainer                 |
| E31R | Multichannel Transmission Systems Operator-Maintainer |
| E31S | Satellite Communications Systems Operator-Maintainer  |
| E31T | Satellite/Microwave Systems Chief                     |
| E31U | Signal Support Systems Specialist                     |
| E31W | Telecommunications Operations Chief                   |
| E31Z | Senior Signal Sergeant                                |
| E74B | Information Systems Operator-Analyst                  |
| E74C | Telecommunications Operator-Maintainer                |
| E74Z | Information Systems Chief                             |

#### Construction

|      |                                         |
|------|-----------------------------------------|
| E21C | Bridge Crewmember                       |
| E21E | Construction Equipment Operator         |
| E21F | Crane Operator                          |
| E21H | Construction Engineering Supervisor     |
| E21J | General Construction Equipment Operator |
| E21K | Plumber                                 |
| E21M | Firefighter                             |
| E21N | Construction Equipment Supervisor       |
| E21P | Prime Power Production Specialist       |
| E21R | Interior Electrician                    |
| E21S | Topographic Surveyor                    |
| E21T | Technical Engineer                      |
| E21U | Topographic Analyst                     |
| E21V | Concrete and Asphalt Equipment Operator |
| E21W | Carpentry and Masonry Specialist        |
| E21Y | Geospatial Engineer                     |
| E62B | Construction Equipment Repairer         |
| E62H | Concrete & Asphalt Equipment Operator   |

#### Food Personnel

|      |                         |
|------|-------------------------|
| E92G | Food Service Specialist |
|------|-------------------------|

#### Health Care Personnel (Excluding Combat Medic)

|      |                                 |
|------|---------------------------------|
| E18D | Special Forces Medical Sergeant |
| E68A | Biomedical Equipment Specialist |

|      |                                       |
|------|---------------------------------------|
| E68D | Operating Room Specialist             |
| E68E | Dental Specialist                     |
| E68H | Optical Laboratory Specialist         |
| E68J | Medical Logistics Specialist          |
| E68K | Medical Laboratory Specialist         |
| E68M | Nutrition Care Specialist             |
| E68P | Radiology Specialist                  |
| E68Q | Pharmacy Specialist                   |
| E68R | Veterinary Food Inspection Specialist |
| E68S | Preventive Medicine Specialist        |
| E68T | Animal Care Specialist                |
| E68V | Respiratory Specialist                |
| E68Z | Chief Medical NCO                     |
| E91A | Medical Equipment Repairer            |
| E91D | Operating Room Specialist             |
| E91E | Dental Specialist                     |
| E91G | Patient Administration Specialist     |
| E91H | Optical Laboratory Specialist         |
| E91J | Medical Logistics Specialist          |
| E91K | Medical Laboratory Specialist         |
| E91M | Nutrition Care Specialist             |
| E91P | Radiology Specialist                  |
| E91Q | Pharmacy Specialist                   |
| E91R | Veterinary Food Inspection Specialist |
| E91S | Preventive Medicine Specialist        |
| E91T | Animal Care Specialist                |
| E91V | Respiratory Specialist                |
| E91Z | Chief Medical NCO                     |

#### Intelligence/Interrogators

|      |                                                                  |
|------|------------------------------------------------------------------|
| E15W | Unmanned Aerial Vehicle (UAV) Operator                           |
| E33W | Military Intelligence Systems Maintainer/Integrator              |
| E35F | Intelligence Analyst                                             |
| E35G | Imagery Analyst                                                  |
| E35K | Unmanned Aerial Vehicle (UAV) Operator                           |
| E35L | Counter Intelligence Agent                                       |
| E35M | Human Intelligence Collector                                     |
| E35N | Signals Intelligence Analyst                                     |
| E35P | Cryptologic Linguist                                             |
| E35S | Signals Collector/Analyst                                        |
| E35W | EW/SIGINT Specialty (Linguist) Training Accession Reporting Code |
| E35Y | Chief Counterintelligence/Human Intelligence Sergeant            |
| E35Z | Signals Intelligence (SIGINT) Senior Sergeant/SIGINT Chief       |
| E96B | Intelligence Analyst                                             |
| E96D | Imagery Analyst                                                  |
| E96H | Common Ground Station Operator                                   |
| E96R | Ground Surveillance Systems Operator                             |
| E96U | Unmanned Aerial Vehicle Operator                                 |
| E96Z | Intelligence Senior Sergeant                                     |
| E97B | Counter-Intelligence Analyst                                     |

|      |                                                                 |
|------|-----------------------------------------------------------------|
| E97E | Human Intelligence Collector                                    |
| E97Z | Counterintelligence/Human Intelligence, Senior Sergeant         |
| E98C | Signals Intelligence Analyst                                    |
| E98G | Cryptologic Communications Interceptor/Locator                  |
| E98H | Communications Interceptor/Locator                              |
| E98J | Electronic Intelligence Interceptor/Analyst                     |
| E98K | Signals Collection/Identification Analyst                       |
| E98P | Multi-Sensor Operator                                           |
| E98Y | Signals Collector/Analyst                                       |
| E98Z | Signals Intelligence (Electronic Warfare) Senior Sergeant/Chief |

#### Law Enforcement/Military Police

|      |                                    |
|------|------------------------------------|
| E27D | Paralegal Specialist               |
| E31B | Military Police                    |
| E31D | CID Special Agent                  |
| E31E | Internment/Resettlement Specialist |
| E95B | Military Police                    |

#### Missiles/Rockets Operators (Combat)

|      |                                                                                                                                     |
|------|-------------------------------------------------------------------------------------------------------------------------------------|
| E13C | Tactical Automated Fire Control Systems Specialist                                                                                  |
| E13D | Field Artillery Automated Tactical Data System Specialist                                                                           |
| E13M | Multiple Launch Rocket System (MLRS) Crewmember                                                                                     |
| E13R | Field Artillery (FA) Firefinder Radar Operator                                                                                      |
| E13W | Field Artillery Meteorological Crewmember                                                                                           |
| E14E | PATRIOT Fire Control Enhanced Operator/Maintainer                                                                                   |
| E14J | Air Defense Command, Control, Communications, Computers and Intelligence<br>Tactical Operations Center Enhanced Operator/Maintainer |
| E14R | BRADLEY LINEBACKER Crewmember                                                                                                       |
| E14S | Air and Missile Defense (AMD) Crewmember                                                                                            |
| E14T | PATRIOT Launching Station Enhanced Operator/Maintainer                                                                              |
| E14Z | Air Defense Artillery Senior Sergeant                                                                                               |

#### Missiles/Rockets Operators (Non-Combat)

|      |                                                                           |
|------|---------------------------------------------------------------------------|
| E13P | Multiple Launch Rocket System (MLRS) Operations/Fire Direction Specialist |
| E13Z | Field Artillery Senior Sergeant                                           |

#### Mortuary Affairs Personnel

|      |                             |
|------|-----------------------------|
| E92M | Mortuary Affairs Specialist |
|------|-----------------------------|

#### Motor Transport

|      |                                       |
|------|---------------------------------------|
| E88H | Cargo Specialist                      |
| E88K | Watercraft Operator                   |
| E88L | Watercraft Engineer                   |
| E88M | Motor Transport Operator              |
| E88N | Transportation Management Coordinator |
| E88Z | Transportation Senior Sergeant        |

#### Nuclear, Chemical, Biological Operations Specialist

|      |                                |
|------|--------------------------------|
| E54B | Chemical Operations Specialist |
| E55B | Ammunition Specialist          |

|      |                                                                   |
|------|-------------------------------------------------------------------|
| E55D | Explosive Ordnance Disposal Specialist                            |
| E74D | Chemical, Biological, Radiological, and Nuclear (CBRN) Specialist |
| E89A | Ammunition Stock Control and Accounting Specialist                |
| E89B | Ammunition Specialist                                             |
| E89D | Explosive Ordnance Disposal Specialist                            |

#### PsyOps

|      |                                     |
|------|-------------------------------------|
| E37F | Psychological Operations Specialist |
|------|-------------------------------------|

#### Recruiter

|      |                                                                         |
|------|-------------------------------------------------------------------------|
| E79R | Recruiter                                                               |
| E79S | Career Counselor                                                        |
| E79T | Recruiting and Retention NCO (Army National Guard of the United States) |
| E79V | Army Reserve Career Counselor (Army Reserve)                            |

#### Repair/Maintenance

|      |                                                          |
|------|----------------------------------------------------------|
| E15B | Aircraft Powerplant Repairer                             |
| E15D | Aircraft Powertrain Repairer                             |
| E15F | Aircraft Electrician                                     |
| E15G | Aircraft Structural Repairer                             |
| E15H | Aircraft Pneudraulics Repairer                           |
| E15J | OH-58D/ARH Armament/Electrical/Avionics Systems Repairer |
| E15K | Aircraft Components Repair Supervisor                    |
| E15M | UH-1 Helicopter Repairer (RC)                            |
| E15N | Avionic Mechanic                                         |
| E15R | AH-64 Attack Helicopter Repairer                         |
| E15S | OH-58D/ARH Helicopter Repairer                           |
| E15T | UH-60 Helicopter Repairer                                |
| E15U | CH-47 Helicopter Repairer                                |
| E15V | Observation/Scout Helicopter Repairer (RC)               |
| E15Y | AH-64D Armament/Electrical/Avionics Systems Repairer     |
| E15Z | Aircraft Maintenance Senior Sergeant                     |
| E27E | Land Combat Electronic Missile System Repairer           |
| E27M | Multiple Launch Rocket System (MLRS) Repairer            |
| E27T | AVENGER System Repairer                                  |
| E27Z | Missile Systems Maintenance Chief                        |
| E31C | Radio Operator-Maintainer                                |
| E35A | Land Combat Electronics Missile System Repairer          |
| E35D | Air Traffic Control Equipment Repairer                   |
| E35E | Radio and Communications Security (COMSEC) Repairer      |
| E35F | Special Electronic Devices Repairer                      |
| E35H | TMDE Maintenance Support Specialist                      |
| E35J | Computer/Automation Systems Repairer                     |
| E35K | APACHE Attack Helicopter Systems Repairer                |
| E35L | Avionic Communications Equipment Repairer                |
| E35M | Radar Repairer                                           |
| E35N | Wire Systems Equipment Repairer                          |
| E35P | Multiple Launch Rocket System (MLRS) Repairer            |
| E35R | Avionic Systems Repairer                                 |
| E35S | PATRIOT System Repairer                                  |

|      |                                                         |
|------|---------------------------------------------------------|
| E35T | AVENGER System Repairer                                 |
| E35V | Electronic and Missile Systems Maintenance Chief        |
| E35W | Electronic Maintenance Chief                            |
| E35Y | Integrated Family of Test Equipment Operator/Maintainer |
| E35Z | Senior Electronics Maintenance Chief                    |
| E39B | Automatic Test Equipment Operator/Maintainer            |
| E44B | Metal Worker                                            |
| E44E | Machinist                                               |
| E45B | Small Arms/Artillery Repairer                           |
| E45D | Self-Propelled Field Artillery Turret Mechanic          |
| E45E | M1 ABRAMS Tank Turret Mechanic                          |
| E45G | Fire Control Repairer                                   |
| E45K | Armament Repairer                                       |
| E51R | Interior Electrician                                    |
| E51Z | General Engineering Supervisor                          |
| E52C | Utilities Equipment Repairer                            |
| E52D | Power-Generation Equipment Repairer                     |
| E63A | M1 ABRAMS Tank System Maintainer                        |
| E63B | Wheeled Vehicle Mechanic                                |
| E63D | Artillery Mechanic                                      |
| E63E | M1 ABRAMS Tank System Mechanic                          |
| E63G | Fuel & Electrical System Repairer                       |
| E63H | Track Vehicle Repairer                                  |
| E63J | Quartermaster and Chemical Equipment Repairer           |
| E63M | BRADLEY Fighting Vehicle System Maintainer              |
| E63S | Heavy Wheel Vehicle Mechanic                            |
| E63T | BRADLEY Fighting Vehicle System Mechanic                |
| E63W | Wheel Vehicle Repairer                                  |
| E63Y | Track Vehicle Mechanic                                  |
| E63Z | Mechanical Maintenance Supervisor                       |
| E67N | UH-1 Helicopter Repairer                                |
| E67R | AH-64 Attack Helicopter Repairer                        |
| E68B | Aircraft Powerplant Repairer                            |
| E68G | Aircraft Structural Repairer                            |
| E68J | Aircraft Armament/Missile Systems Repairer (RC)         |
| E68N | Avionic Mechanic                                        |
| E91A | M1 Abrams Tank System Maintainer                        |
| E91B | Wheeled Vehicle Repairer                                |
| E91C | Utilities Equipment Repairer                            |
| E91D | Power Generation Equipment Repairer                     |
| E91E | Allied Trades Specialist                                |
| E91F | Small Arms/Artillery Repairer                           |
| E91G | Fire Control Repairer                                   |
| E91H | Tracked Vehicle Repairer                                |
| E91J | Quartermaster and Chemical Equipment Repairer           |
| E91K | Armament Repairer                                       |
| E91L | Construction Equipment Repairer                         |
| E91M | BRADLEY Fighting Vehicle System Maintainer              |
| E91P | Artillery Mechanic                                      |
| E91W | Metal Worker                                            |

|      |                                                                                   |
|------|-----------------------------------------------------------------------------------|
| E94A | Land Combat Electronic Missile System Repairer                                    |
| E94D | Air Traffic Control Equipment Repairer                                            |
| E94E | Radio and Communications Security (COMSEC) Repairer                               |
| E94F | Computer/Detection Systems Repairer                                               |
| E94H | Test, Measurement, and Diagnostic Equipment (TMDE) Maintenance Support Specialist |
| E94K | APACHE Attack Helicopter Systems Repairer                                         |
| E94L | Avionic Communications Equipment Repairer                                         |
| E94M | Radar Repairer                                                                    |
| E94P | Multiple Launch Rocket System (MLRS) Repairer                                     |
| E94R | Avionic and Survivability Equipment Repairer                                      |
| E94S | PATRIOT System Repairer                                                           |
| E94T | AVENGER System Repairer                                                           |
| E94V | Electronic and Missile Systems Maintenance Chief                                  |
| E94W | Electronic Maintenance Chief                                                      |
| E94Y | Integrated Family of Test Equipment (IFTE) Operator and Maintainer                |
| E94Z | Senior Electronic Maintenance Chief                                               |

#### Trainee

|      |                                                          |
|------|----------------------------------------------------------|
| E09B | Trainee                                                  |
| E09C | Trainee, Language                                        |
| E09R | Simultaneous Management Program Participant              |
| E09S | Commissioned Officer Candidate                           |
| E09W | Warrant Officer Candidate                                |
| E11X | Infantryman                                              |
| E15X | AH-64A Armament/Electrical Systems Repairer              |
| E18X | Special Forces Weapons Sergeant                          |
| E21X | General Engineering Supervisor                           |
| E25X | Senior Signal Sergeant                                   |
| E27X | PATRIOT System Repairer                                  |
| E35X | Intelligence Senior Sergeant/Chief Intelligence Sergeant |
| E52X | Special Purpose Equipment Repairer                       |
| E63X | Maintenance Supervisor                                   |
| E68X | AH-64A Armament/Electrical Systems Repairer              |
| E91X | Maintenance Supervisor                                   |
| E91X | Mental Health Specialist                                 |
| E94X | Senior Missile Systems Maintainer                        |
| E98X | EW/SIGINT Specialty (Linguist) (Reporting Code)          |

#### Undefined MOS (MOS not in 2004-09 database or MOS with invalid date range)

E00R  
 E09D  
 E11H  
 E29J  
 E33T  
 E35L  
 E35M  
 E35S  
 E35Z  
 E43E



E43M  
 E68J  
 E68K  
 E68S  
 E71D  
 E71G  
 E75E  
 E76J  
 E76P  
 E91D  
 E91E  
 E91J  
 E91P  
 E94B

MOS not in any of the above categories)

|      |                                                            |
|------|------------------------------------------------------------|
| E00Z | Command Sergeant Major                                     |
| E02A | Army Bandperson                                            |
| E02B | Cornet or Trumpet Player                                   |
| E02C | Euphonium Player                                           |
| E02D | French Horn Player                                         |
| E02E | Trombone Player                                            |
| E02F | Tuba Player                                                |
| E02G | Flute or Piccolo Player                                    |
| E02J | Clarinet Player                                            |
| E02L | Saxophone Player                                           |
| E02M | Percussion Player                                          |
| E02N | Keyboard Player                                            |
| E02S | Special Bands Member                                       |
| E02T | Guitar Player                                              |
| E02U | Electric Bass Player                                       |
| E02Z | Bands Senior Sergeant                                      |
| E09L | Interpreter/Translator                                     |
| E21D | Diver                                                      |
| E21L | Lithographer                                               |
| E35H | Common Ground Station (CGS) Analyst                        |
| E36B | Financial Management Technician                            |
| E38A | Civil Affairs Specialist (RC)                              |
| E38B | Civil Affairs Specialist                                   |
| E42A | Human Resources Specialist                                 |
| E42F | Human Resources Information Systems Management Specialist  |
| E42L | Administrative Specialist                                  |
| E42R | Army Bandperson                                            |
| E42S | Special Band Member                                        |
| E44C | Financial Management Technician                            |
| E46Q | Public Affairs Specialist                                  |
| E46R | Public Affairs Broadcast Specialist                        |
| E46Z | Chief Public Affairs NCO                                   |
| E51C | Acquisition, Logistics & Technology (AL&T) Contracting NCO |
| E57E | Landry & Bath Specialist                                   |

|      |                                               |
|------|-----------------------------------------------|
| E71L | Administrative Specialist                     |
| E73C | Finance Specialist                            |
| E73D | Accounting Specialist                         |
| E73Z | Finance Senior Sergeant                       |
| E75H | Personnel Services Specialist                 |
| E77F | Petroleum Supply Specialist                   |
| E92A | Automated Logistical Specialist               |
| E92F | Petroleum Supply Specialist                   |
| E92L | Petroleum Laboratory Specialist               |
| E92R | Parachute Rigger                              |
| E92S | Shower/Laundry and Clothing Repair Specialist |
| E92W | Water Treatment Specialist                    |
| E92Y | Unit Supply Specialist                        |
| E92Z | Senior Noncommissioned Logistician            |

---

**Table S3: International Classification of Diseases, Ninth Revision–Clinical Modification (ICD-9-CM) Codes Used to Identify Mental Disorders.**

| Included Mental Health Diagnoses                                       | ICD-9-CM Codes                                                                                                                                                                                                |
|------------------------------------------------------------------------|---------------------------------------------------------------------------------------------------------------------------------------------------------------------------------------------------------------|
| Adjustment Disorder                                                    | 309, .29, .3, .4, .82, .83, .89, .9                                                                                                                                                                           |
| Dysthymic Disorder/ Neurasthenia/<br>Depression NOS                    | 296.82, .90, .99<br>300.4, .5<br>309.0, .1<br>311, .0, .1<br>313.1                                                                                                                                            |
| Major Depression                                                       | 296.2, .20, .21, .22, .23, .24, .25, .26, .3, .30, .31, .32, .33, .34, .35, .36                                                                                                                               |
| Bipolar Disorder                                                       | 296.00, .01, .02, .03, .04, .05, .06, .10, .11, .12, .13, .14, .15, .16, .40, .41, .42, .43, .44, .45, .46, .50, .51, .52, .53, .54, .55, .56, .60, .61, .62, .63, .64, .65, .66, .7, .80, .81, .89<br>301.13 |
| Anxiety State/ Anxiety Disorder                                        | 300, .00, .01, .02, .09, .20, .21, .22, .23, .29, .3<br>309.21, .24, .28<br>313.0, .21, .22, .23                                                                                                              |
| Post-Traumatic Stress Disorder                                         | 309.81                                                                                                                                                                                                        |
| Attention-Deficit/Hyperactivity Disorder/<br>Learning Disorders        | 314.0, .00, .01, .1, .2, .8, .9<br>315.00, .01, .02, .09, .1, .2, .3, .31, .32, .34, .39, .4, .5, .8, .9                                                                                                      |
| Conduct Disorder/ Oppositional Defiant<br>Disorder                     | 301.7<br>312.4, .8, .81, .82, .89, .9<br>313.81<br>V62.83                                                                                                                                                     |
| Eating Disorders                                                       | 307.1, .50, .51, .59                                                                                                                                                                                          |
| Other Impulse Control Disorders                                        | 312.00, .01, .02, .03, .10, .11, .12, .13, .20, .21, .22, .23, .3, .30, .31, .32, .33, .34, .35, .39                                                                                                          |
| Alcohol Induced Mental Disorders/ Alcohol<br>Dependence/ Alcohol Abuse | 291.0, .1, .2, .3, .4, .5, .8, .81, .82, .89, .9<br>303.00, .01, .02, .03, .9, .90, .91, .92, .93<br>305, .0, .00, .01, .02, .03                                                                              |

|                                        |                                                                                                                                                                                                                                                                                                                                                                                     |
|----------------------------------------|-------------------------------------------------------------------------------------------------------------------------------------------------------------------------------------------------------------------------------------------------------------------------------------------------------------------------------------------------------------------------------------|
| Drug Induced Mental Disorders          | 292                                                                                                                                                                                                                                                                                                                                                                                 |
| Non-Dependent Drug Abuse               | 305.2, .20, .21, .22, .23, .3, .30, .31, .32, .33, .4, .40, .41, .42, .43, .5, .50, .51, .52, .53, .6, .60, .61, .62, .63, .7, .70, .71, .72, .73, .8, .80, .81, .82, .83, .9, .90, .91, .92, .93                                                                                                                                                                                   |
| Drug dependence                        | 304                                                                                                                                                                                                                                                                                                                                                                                 |
| Personality Disorders                  | 301.0, .1, .10, .11, .12, .20, .21, .22, .3, .4, .50, .51, .59, .6, .8, .80, .81, .82, .83, .84, .89, .9                                                                                                                                                                                                                                                                            |
| Non-Affective Psychosis                | 295.00, .01, .02, .03, .04, .05, .10, .11, .12, .13, .14, .15, .20, .21, .22, .23, .24, .25, .30, .31, .32, .33, .34, .35, .40, .41, .42, .43, .44, .45, .50, .51, .52, .53, .54, .60, .61, .62, .63, .64, .65, .70, .71, .72, .73, .74, .75, .80, .81, .82, .83, .84, .85, .90, .91, .92, .93, .94, .95<br><br>297.0, .1, .2, .3, .8, .9<br><br>298.0, .1, .2, .3, .4, .8, .9, .90 |
| Somatoform/ Dissociative Disorders     | 300.10, .11, .12, .13, .14, .15, .16, .19, .6, .7, .80, .81, .82, .89<br><br>306.0, .1, .2, .3, .4, .50, .51, .52, .53, .59, .6, .7, .8, .9<br><br>307.54, .80, .81, .89                                                                                                                                                                                                            |
| Organic Mental Disorders               | 290.0, .10, .11, .12, .13, .20, .21, .3, .40, .41, .42, .43, .8, .9<br><br>293.0, .1, .81, .82, .83, .84, .89, .89, .9<br><br>294.0, .1, .10, .11, .8, .9<br><br>307.20, .21, .22, .23, .3<br><br>310.0, .8, .9<br><br>317<br><br>318.0, .1, 2<br><br>319                                                                                                                           |
| Sexual Disorders                       | 302, .0, .1, .2, .3, .4, .50, .51, .52, .53, .6, .70, .71, .72, .73, .74, .75, .76, .79, .81, .82, .83, .84, .85, .89, .9                                                                                                                                                                                                                                                           |
| Sleep Disorders                        | 307.4, .40, .41, .42, .43, .44, .45, .46, .47, .48, .49                                                                                                                                                                                                                                                                                                                             |
| Other Mental Disorders/ Mental Illness | 292.85<br><br>299.00, .01, .10, .80, .81, .90, .91<br><br>300.9<br><br>307.0, .52, .53, .6, .7, .9<br><br>309.22<br><br>310.1                                                                                                                                                                                                                                                       |

|                  |                             |
|------------------|-----------------------------|
|                  | 313.3, .82, .89, .9         |
|                  | 316                         |
| Traumatic Stress | 308, .0, .1, .2, .3, .4, .9 |

---

| Excluded Mental Health Diagnoses                    | ICD-9-CM Codes                                                                                                                                                                                                                                                                                 |
|-----------------------------------------------------|------------------------------------------------------------------------------------------------------------------------------------------------------------------------------------------------------------------------------------------------------------------------------------------------|
| Postconcussion Syndrome                             | 310.2                                                                                                                                                                                                                                                                                          |
| Tobacco Use Disorder                                | 305.1, .10, .11, .12, .13                                                                                                                                                                                                                                                                      |
| Symptoms, Signs, and Ill-Defined Conditions, Mental | 797<br>798, .0, .1, .2, .9<br>799, .0, .01, .02, .1, .2, .21, .22, .23, .24, .25, .29, .3, .4, .8, .81, .82, .89, .9                                                                                                                                                                           |
| Stressors/ Adversities                              | V40.0, .00, .1, .2, .20, .3, .30, .9, .90<br>V61, .0, .01, .02, .03, .04, .05, .06, .07, .08, .09, .2, .20, .21, .22, .23, .24, .29, .3, .4, .41, .42, .49, .8, .9<br>V62, .0, .1, .10, .2, .20, .21, .22, .29, .3, .4, .5, .8, .80, .81, .810, .811, .812, .82, .89, .9, .90<br>V69.4, .5, .9 |
| Marital Problems                                    | V61.1, .10, .11, .12                                                                                                                                                                                                                                                                           |
| Prior History of Mental Disorders                   | V11.0, .1, .2, .3, .8, .80, .9, .90<br>V66.3<br>V67.3                                                                                                                                                                                                                                          |
| Indicator of Impulsivity and Risky Behavior         | V69.2, .3                                                                                                                                                                                                                                                                                      |
| Self-Damaging Behavior                              | V69.8                                                                                                                                                                                                                                                                                          |

---

**Table S4. Multivariate association of military occupation with suicide attempt among Regular Army enlisted soldiers, adjusting for socio-demographics, service-related variables, and prior mental health diagnosis.<sup>1,2</sup>**

|                   | OR         | (95% CI)  | Cases (n) | Total (n) <sup>3</sup> | Rate <sup>4</sup> | Pop % <sup>5</sup> | SRE <sup>6</sup> |
|-------------------|------------|-----------|-----------|------------------------|-------------------|--------------------|------------------|
| <b>Occupation</b> |            |           |           |                        |                   |                    |                  |
| Combat arms       | 1.2*       | (1.1–1.3) | 2,506     | 7,159,106              | 420               | 23.3               | 427              |
| Special forces    | 0.5*       | (0.3–0.7) | 16        | 368,016                | 52                | 1.2                | 162              |
| Combat medic      | 1.3*       | (1.2–1.4) | 682       | 1,470,882              | 556               | 4.8                | 464              |
| Other             | 1.0        | –         | 6,446     | 21,716,246             | 356               | 70.7               | 355              |
|                   | $\chi^2_3$ | 96.2*     |           |                        |                   |                    |                  |

<sup>1</sup>The sample of enlisted soldiers (n=9,650 cases, 153,523 control person-months) is a subset of the total sample (n=193,617 person-months) from the Army STARRS Historical Administrative Data Study (HADS). Control person-months were assigned a weight of 200 to adjust for under-sampling.

<sup>2</sup>Logistic regression models included gender, age at Army entry, current age, race/ethnicity, education, marital status, time in service ( $\leq 1$  year, 2 years, 3–4 years, 5–10 years,  $>10$  years), deployment status (never, currently, or previously deployed), prior mental health diagnosis, and military occupation. The models also included a dummy predictor variable for calendar month and year to control for secular trends.

<sup>3</sup>Total includes both cases (i.e., soldiers with a suicide attempt) and control person-months.

<sup>4</sup>Rate per 100,000 person-years, calculated based on  $n_1/n_2$ , where  $n_1$  is the unique number of soldiers within each category and  $n_2$  is the annual number of person-years, not person-months, in the population (n=3.08 million).

<sup>5</sup>Pop % = percent of the population of enlisted soldier.

<sup>6</sup>SRE = Standardized risk estimates (suicide attempters per 100,000 person-years) were calculated assuming other predictors were at their sample-wide means.

\* $p < 0.05$

**Table S5. Multivariate association of military occupation with suicide attempt among male and female Regular Army enlisted soldiers, adjusting for socio-demographics, service-related variables, and prior mental health diagnosis.<sup>1,2</sup>**

|                   | Males               |           |                  | Females             |           |                  |
|-------------------|---------------------|-----------|------------------|---------------------|-----------|------------------|
|                   | OR                  | (95% CI)  | SRE <sup>3</sup> | OR                  | (95% CI)  | SRE <sup>3</sup> |
| <b>Occupation</b> |                     |           |                  |                     |           |                  |
| Combat arms       | 1.2*                | (1.2–1.3) | 370              | –                   | –         | –                |
| Special forces    | 0.5*                | (0.3–0.7) | 139              | –                   | –         | –                |
| Combat medic      | 1.3*                | (1.2–1.4) | 389              | 1.3*                | (1.2–1.5) | 884              |
| Other             | 1.0                 | –         | 303              | 1.0                 | –         | 675              |
|                   | $\chi^2_3 = 83.2^*$ |           |                  | $\chi^2_1 = 18.6^*$ |           |                  |

<sup>1</sup>The sample of enlisted soldiers (n=9,650 cases, 153,523 control person-months) is a subset of the total sample (n=193,617 person-months) from the Army STARRS Historical Administrative Data Study (HADS). Control person-months were assigned a weight of 200 to adjust for under-sampling.

<sup>2</sup>Logistic regression models included gender, age at Army entry, current age, race/ethnicity, education, marital status, time in service ( $\leq 1$  year, 2 years, 3–4 years, 5–10 years,  $>10$  years), deployment status (never, currently, or previously deployed), prior mental health diagnosis, and military occupation. The models also included a dummy predictor variable for calendar month and year to control for secular trends.

<sup>3</sup>SRE = standardized risk estimates (suicide attempters per 100,000 person-years) were calculated assuming other predictors were at their sample-wide means.

\* $p < 0.05$

**Table S6. Counts and rates of suicide attempt by military occupation among Regular Army enlisted soldiers stratified by deployment status.<sup>1</sup>**

|                   | Deployment Status              |                           |                   |                       |                  |                                    |                           |                   |                       |                  |                                     |                           |                   |                       |                  |
|-------------------|--------------------------------|---------------------------|-------------------|-----------------------|------------------|------------------------------------|---------------------------|-------------------|-----------------------|------------------|-------------------------------------|---------------------------|-------------------|-----------------------|------------------|
|                   | Never Deployed<br>(n = 67,336) |                           |                   |                       |                  | Currently Deployed<br>(n = 36,460) |                           |                   |                       |                  | Previously Deployed<br>(n = 57,521) |                           |                   |                       |                  |
|                   | Cases<br>(n)                   | Total<br>(n) <sup>2</sup> | Rate <sup>3</sup> | Pop<br>% <sup>4</sup> | SRE <sup>5</sup> | Cases<br>(n)                       | Total<br>(n) <sup>2</sup> | Rate <sup>3</sup> | Pop<br>% <sup>4</sup> | SRE <sup>5</sup> | Cases<br>(n)                        | Total<br>(n) <sup>2</sup> | Rate <sup>3</sup> | Pop<br>% <sup>4</sup> | SRE <sup>5</sup> |
| <b>Occupation</b> |                                |                           |                   |                       |                  |                                    |                           |                   |                       |                  |                                     |                           |                   |                       |                  |
| Combat arms       | 1,286                          | 2,374,686                 | 650               | 19.3                  | 610              | 262                                | 2,053,262                 | 153               | 28.9                  | 159              | 958                                 | 2,731,158                 | 421               | 25.0                  | 358              |
| Combat medic      | 480                            | 667,680                   | 863               | 5.4                   | 801              | 59                                 | 304,259                   | 233               | 4.3                   | 208              | 143                                 | 498,943                   | 344               | 4.6                   | 352              |
| Other             | 4,117                          | 9,254,117                 | 534               | 75.3                  | 546              | 619                                | 4,747,419                 | 157               | 66.8                  | 155              | 1,710                               | 7,714,710                 | 266               | 70.5                  | 283              |

<sup>1</sup>The sample of enlisted soldiers (n=9,650 cases, 153,523 control person-months) is a subset of the total sample (n=193,617 person-months) from the Army STARRS Historical Administrative Data Study (HADS). Control person-months were assigned a weight of 200 to adjust for under-sampling.

<sup>2</sup>Total includes both cases (i.e., soldiers with a suicide attempt) and control person-months.

<sup>3</sup>Rate per 100,000 person-years, calculated based on  $n_1/n_2$ , where  $n_1$  is the unique number of soldiers within each category and  $n_2$  is the annual number of person-years, not person-months, in the population (n=3.08 million).

<sup>4</sup>Pop % = Population percent.

<sup>5</sup>SRE = Standardized risk estimates (suicide attempters per 100,000 person-years) were calculated assuming other predictors were at their sample-wide means. SREs were calculated based on logistic regression models that included gender, age at entry into the Army, current age, race/ethnicity, education, marital status, time in service ( $\leq 1$  year, 2 years, 3-4 years, 5-10 years, >10 years), deployment status (never, currently, or previously deployed), and military occupation. The models also included a dummy predictor variable for calendar month and year to control for secular trends.



**Table S7a. Pairwise tests examining multivariate associations of deployment status with suicide attempt among Regular Army enlisted soldiers stratified by military occupation.<sup>1,2</sup>**

| Deployment status                          | Occupation  |           |              |           |       |           |
|--------------------------------------------|-------------|-----------|--------------|-----------|-------|-----------|
|                                            | Combat arms |           | Combat medic |           | Other |           |
|                                            | OR          | (95% CI)  | OR           | (95% CI)  | OR    | (95% CI)  |
| Never deployed vs. currently deployed      | 3.3*        | (2.8–3.8) | 1.9*         | (1.4–2.6) | 2.1*  | (1.9–2.3) |
| Previously deployed vs. currently deployed | 3.8*        | (3.3–4.4) | 2.4*         | (1.7–3.2) | 2.5*  | (2.3–2.8) |
| Previously deployed vs. never deployed     | 1.2*        | (1.0–1.3) | 1.2          | (1.0–1.6) | 1.2*  | (1.1–1.3) |
| $\chi^2_2$                                 |             | 367.0*    |              | 29.8*     |       | 378.1*    |

**eTable 7b. Pairwise tests examining multivariate associations of military occupation with suicide attempt among Regular Army enlisted soldiers stratified by deployment status.<sup>1,2</sup>**

| Occupation                   | Deployment status |           |                    |           |                     |           |
|------------------------------|-------------------|-----------|--------------------|-----------|---------------------|-----------|
|                              | Never deployed    |           | Currently deployed |           | Previously deployed |           |
|                              | OR                | (95% CI)  | OR                 | (95% CI)  | OR                  | (95% CI)  |
| Combat arms vs. other        | 1.1*              | (1.0–1.2) | 1.0                | (0.9–1.2) | 1.3*                | (1.2–1.4) |
| Combat medic vs. other       | 1.5*              | (1.3–1.6) | 1.3*               | (1.0–1.8) | 1.2*                | (1.0–1.5) |
| Combat medic vs. combat arms | 1.3*              | (1.2–1.5) | 1.3                | (1.0–1.8) | 1.0                 | (0.8–1.2) |
| $\chi^2_2$                   |                   | 67.2*     |                    | 4.5       |                     | 32.8*     |

<sup>1</sup>The sample of enlisted soldiers (n=9,650 cases, 153,523 control person-months) is a subset of the total sample (n=193,617 person-months) from the Army STARRS Historical Administrative Data Study (HADS). Control person-months were assigned a weight of 200 to adjust for under-sampling.

<sup>2</sup>Logistic regression models included gender, age at Army entry, current age, race/ethnicity, education, marital status, time in service ( $\leq 1$  year, 2 years, 3-4 years, 5-10 years,  $>10$  years), deployment status (never, currently, or previously deployed), and military occupation. The models also included a dummy predictor variable for calendar month and year to control for secular trends.

\* $p < 0.05$

**Table S8. Counts and rates of suicide attempts by military occupation among Regular Army enlisted soldiers stratified by time in service.<sup>1</sup>**

| Occupation   | Times in service          |                        |                   |                    |                  |                            |                        |                   |                    |                  |
|--------------|---------------------------|------------------------|-------------------|--------------------|------------------|----------------------------|------------------------|-------------------|--------------------|------------------|
|              | ≤ 1 year<br>(n = 25,786)  |                        |                   |                    |                  | 2 years<br>(n = 22,162)    |                        |                   |                    |                  |
|              | Cases (n)                 | Total (n) <sup>2</sup> | Rate <sup>3</sup> | Pop % <sup>4</sup> | SRE <sup>5</sup> | Cases (n)                  | Total (n) <sup>2</sup> | Rate <sup>3</sup> | Pop % <sup>4</sup> | SRE <sup>5</sup> |
| Combat arms  | 800                       | 1,211,400              | 793               | 27                 | 931              | 545                        | 1,136,945              | 575               | 28.2               | 657              |
| Combat medic | 301                       | 230,101                | 1,570             | 5.1                | 1,313            | 133                        | 186,533                | 856               | 4.6                | 795              |
| Other        | 2,297                     | 3,039,497              | 907               | 67.8               | 868              | 1,334                      | 2,708,534              | 591               | 67.2               | 565              |
| Occupation   | 3-4 years<br>(n = 36,155) |                        |                   |                    |                  | 5-10 years<br>(n = 42,701) |                        |                   |                    |                  |
|              | Cases (n)                 | Total (n) <sup>2</sup> | Rate <sup>3</sup> | Pop % <sup>4</sup> | SRE <sup>5</sup> | Cases (n)                  | Total (n) <sup>2</sup> | Rate <sup>3</sup> | Pop % <sup>4</sup> | SRE <sup>5</sup> |
|              | Cases (n)                 | Total (n) <sup>2</sup> | Rate <sup>3</sup> | Pop % <sup>4</sup> | SRE <sup>5</sup> | Cases (n)                  | Total (n) <sup>2</sup> | Rate <sup>3</sup> | Pop % <sup>4</sup> | SRE <sup>5</sup> |
| Combat arms  | 673                       | 1,847,073              | 437               | 27.3               | 453              | 409                        | 1,720,809              | 285               | 20.9               | 279              |
| Combat medic | 131                       | 323,531                | 486               | 4.8                | 494              | 87                         | 394,287                | 265               | 4.8                | 253              |
| Other        | 1,473                     | 4,607,273              | 384               | 68                 | 378              | 1,043                      | 6,118,843              | 205               | 74.3               | 207              |
| Occupation   | >10 years<br>(n = 34,513) |                        |                   |                    |                  |                            |                        |                   |                    |                  |
|              | Cases (n)                 | Total (n) <sup>2</sup> | Rate <sup>3</sup> | Pop % <sup>4</sup> | SRE <sup>5</sup> |                            |                        |                   |                    |                  |
|              | Cases (n)                 | Total (n) <sup>2</sup> | Rate <sup>3</sup> | Pop % <sup>4</sup> | SRE <sup>5</sup> |                            |                        |                   |                    |                  |
| Combat arms  | 79                        | 1,242,879              | 76                | 18.2               | 76               |                            |                        |                   |                    |                  |
| Combat medic | 30                        | 336,430                | 107               | 4.9                | 98               |                            |                        |                   |                    |                  |
| Other        | 299                       | 5,242,099              | 68                | 76.8               | 69               |                            |                        |                   |                    |                  |

<sup>1</sup>The sample of enlisted soldiers (n=9,650 cases, 153,523 control person-months) is a subset of the total sample (n=193,617 person-months) from the Army STARRS Historical Administrative Data Study (HADS). Control person-months were assigned a weight of 200 to adjust for under-sampling.

<sup>2</sup>Total includes both cases (i.e., soldiers with a suicide attempt) and control person-months.

<sup>3</sup>Rate per 100,000 person-years, calculated based on  $n_1/n_2$ , where  $n_1$  is the unique number of soldiers within each category and  $n_2$  is the annual number of person-years, not person-months, in the population (n=3.08 million).

<sup>4</sup>Pop % = percent of the population of enlisted soldier.

<sup>5</sup>SRE = Standardized risk estimates (suicide attempters per 100,000 person-years) were calculated assuming other predictors were at their sample-wide means. SREs were calculated based on logistic regression models that included gender, age at entry into the Army, current age, race/ethnicity, education, marital status, time in service (≤ 1 year, 2 years, 3-4 years, 5-10 years, >10 years), deployment status (never, currently, or previously deployed), and military occupation. The models also included a dummy predictor variable for calendar month and year to control for secular trends.

**Table S9a. Pairwise tests examining multivariate associations of time in service with suicide attempt among Regular Army enlisted soldiers stratified by military occupation.<sup>1,2</sup>**

| Time in service          | Occupation  |           |              |            |        |           |
|--------------------------|-------------|-----------|--------------|------------|--------|-----------|
|                          | Combat arms |           | Combat medic |            | Other  |           |
|                          | OR          | (95% CI)  | OR           | (95% CI)   | OR     | (95% CI)  |
| ≤ 1 year vs. 2 years     | 1.0         | (0.9–1.2) | 1.4*         | (1.1–1.7)  | 1.3*   | (1.2–1.4) |
| ≤ 1 year vs. 3-4 years   | 1.3*        | (1.1–1.5) | 2.1*         | (1.6–2.8)  | 1.9*   | (1.7–2.0) |
| ≤ 1 year vs. 5-10 years  | 1.8*        | (1.5–2.3) | 3.3*         | (2.2–4.8)  | 3.2*   | (2.8–3.6) |
| ≤ 1 year vs. >10 years   | 5.9*        | (4.0–8.7) | 5.9*         | (3.1–11.1) | 6.9*   | (5.6–8.5) |
| 2 years vs. 3-4 years    | 1.2*        | (1.1–1.4) | 1.5*         | (1.2–2.0)  | 1.5*   | (1.4–1.6) |
| 2 years vs. 5-10 years   | 1.8*        | (1.5–2.1) | 2.4*         | (1.6–3.4)  | 2.5*   | (2.2–2.8) |
| 2 years vs. >10 years    | 5.7*        | (3.9–8.2) | 4.2*         | (2.3–7.8)  | 5.4*   | (4.4–6.6) |
| 3-4 years vs. 5-10 years | 1.4*        | (1.2–1.7) | 1.6*         | (1.1–2.1)  | 1.7*   | (1.5–1.9) |
| 3-4 years vs. ≥10 years  | 4.6*        | (3.2–6.5) | 2.8*         | (1.6–4.9)  | 3.7*   | (3.1–4.4) |
| 5-10 years vs. >10 years | 3.2*        | (2.3–4.4) | 1.8*         | (1.1–3.0)  | 2.2*   | (1.8–2.6) |
| $\chi^2_4$               | 88.8*       |           | 45.4*        |            | 448.4* |           |

**Table S9b. Pairwise tests examining multivariate associations of military occupation with suicide attempt among Regular Army enlisted soldiers stratified by time in service.<sup>1,2</sup>**

| Occupation                   | Time in service |           |         |           |           |           |            |           |           |           |
|------------------------------|-----------------|-----------|---------|-----------|-----------|-----------|------------|-----------|-----------|-----------|
|                              | ≤ 1 year        |           | 2 years |           | 3-4 years |           | 5-10 years |           | >10 years |           |
|                              | OR              | (95% CI)  | OR      | (95% CI)  | OR        | (95% CI)  | OR         | (95% CI)  | OR        | (95% CI)  |
| Combat arms vs. other        | 1.1             | (1.0–1.2) | 1.2*    | (1.0–1.3) | 1.2*      | (1.1–1.3) | 1.4*       | (1.2–1.5) | 1.1       | (0.9–1.4) |
| Combat medic vs. other       | 1.5*            | (1.3–1.7) | 1.4*    | (1.2–1.7) | 1.3*      | (1.1–1.6) | 1.2        | (1.0–1.5) | 1.4       | (1.0–2.1) |
| Combat medic vs. combat arms | 1.4*            | (1.2–1.6) | 1.2     | (1.0–1.5) | 1.1       | (0.9–1.3) | 0.9        | (0.7–1.2) | 1.3       | (0.8–2.0) |
| $\chi^2_2$                   | 44.9*           |           | 19.1*   |           | 18.7*     |           | 25.4*      |           | 3.7       |           |

<sup>1</sup>The sample of enlisted soldiers (n=9,650 cases, 153,523 control person-months) is a subset of the total sample (n=193,617 person-months) from the Army STARRS Historical Administrative Data Study (HADS). Control person-months were assigned a weight of 200 to adjust for under-sampling.

<sup>2</sup>Logistic regression models included gender, age at Army entry, current age, race/ethnicity, education, marital status, time in service (≤ 1 year, 2 years, 3-4 years, 5-10 years, >10 years), deployment status (never, currently, or previously deployed), and military occupation. The models also included a dummy predictor variable for calendar month and year to control for secular trends.

\* $p < 0.05$

**Table S10. Counts and rates of suicide attempts by socio-demographic and service-related variables among Regular Army enlisted soldiers stratified by military occupation.<sup>1</sup>**

|                            | Occupation                 |                           |                   |                       |                  |                            |                           |                   |                       |                  |                       |                           |                   |                       |                  |
|----------------------------|----------------------------|---------------------------|-------------------|-----------------------|------------------|----------------------------|---------------------------|-------------------|-----------------------|------------------|-----------------------|---------------------------|-------------------|-----------------------|------------------|
|                            | Combat arms<br>(n= 38,289) |                           |                   |                       |                  | Combat medic<br>(n= 8,033) |                           |                   |                       |                  | Other<br>(n= 114,995) |                           |                   |                       |                  |
|                            | Cases<br>(n)               | Total<br>(n) <sup>2</sup> | Rate <sup>3</sup> | Pop<br>% <sup>4</sup> | SRE <sup>5</sup> | Cases<br>(n)               | Total<br>(n) <sup>2</sup> | Rate <sup>3</sup> | Pop<br>% <sup>4</sup> | SRE <sup>5</sup> | Cases<br>(n)          | Total<br>(n) <sup>2</sup> | Rate <sup>3</sup> | Pop<br>% <sup>4</sup> | SRE <sup>5</sup> |
| <b>Gender</b>              |                            |                           |                   |                       |                  |                            |                           |                   |                       |                  |                       |                           |                   |                       |                  |
| Male                       | 2,506                      | 7,159,106                 | 420               | 100.0                 | 420              | 383                        | 1,115,783                 | 412               | 75.9                  | 423              | 4,309                 | 17,864,909                | 289               | 82.3                  | 289              |
| Female                     | –                          | –                         | –                 | –                     | –                | 299                        | 355,099                   | 1,010             | 24.1                  | 935              | 2,137                 | 3,851,337                 | 666               | 17.7                  | 664              |
| <b>Age at army entry</b>   |                            |                           |                   |                       |                  |                            |                           |                   |                       |                  |                       |                           |                   |                       |                  |
| < 21                       | 1,767                      | 4,726,967                 | 449               | 66                    | 424              | 414                        | 810,214                   | 613               | 55.1                  | 568              | 4,281                 | 13,341,081                | 385               | 61.4                  | 366              |
| 21–24                      | 539                        | 1,722,739                 | 375               | 24.1                  | 422              | 164                        | 396,164                   | 497               | 26.9                  | 516              | 1,430                 | 5,302,430                 | 324               | 24.4                  | 340              |
| 25+                        | 200                        | 709,400                   | 338               | 9.9                   | 383              | 104                        | 264,504                   | 472               | 18.0                  | 580              | 735                   | 3,072,735                 | 287               | 14.1                  | 337              |
| <b>Current age</b>         |                            |                           |                   |                       |                  |                            |                           |                   |                       |                  |                       |                           |                   |                       |                  |
| < 21                       | 910                        | 1,371,310                 | 796               | 19.2                  | 560              | 245                        | 182,845                   | 1,608             | 12.4                  | 786              | 2,158                 | 3,058,558                 | 847               | 14.1                  | 425              |
| 21–24                      | 952                        | 2,508,752                 | 455               | 35                    | 393              | 222                        | 401,222                   | 664               | 27.3                  | 535              | 2,321                 | 6,260,121                 | 445               | 28.8                  | 356              |
| 25–29                      | 428                        | 1,577,028                 | 326               | 22                    | 337              | 121                        | 376,721                   | 385               | 25.6                  | 433              | 1,204                 | 5,080,004                 | 284               | 23.4                  | 321              |
| 30–34                      | 139                        | 806,339                   | 207               | 11.3                  | 352              | 65                         | 227,465                   | 343               | 15.5                  | 555              | 428                   | 3,131,628                 | 164               | 14.4                  | 288              |
| 35–39                      | 53                         | 591,053                   | 108               | 8.3                   | 286              | 16                         | 182,416                   | 105               | 12.4                  | 226              | 229                   | 2,499,429                 | 110               | 11.5                  | 275              |
| 40+                        | 24                         | 304,624                   | 95                | 4.3                   | 337              | 13                         | 100,213                   | 156               | 6.8                   | 413              | 106                   | 1,686,506                 | 75                | 7.8                   | 250              |
| <b>Race/ethnicity</b>      |                            |                           |                   |                       |                  |                            |                           |                   |                       |                  |                       |                           |                   |                       |                  |
| White                      | 2,027                      | 5,200,627                 | 468               | 72.6                  | 439              | 513                        | 899,113                   | 685               | 61.1                  | 606              | 4,255                 | 11,955,655                | 427               | 55.1                  | 404              |
| Black                      | 154                        | 780,154                   | 237               | 10.9                  | 355              | 76                         | 296,476                   | 308               | 20.2                  | 449              | 1,184                 | 5,875,584                 | 242               | 27.1                  | 278              |
| Hispanic                   | 225                        | 781,225                   | 346               | 10.9                  | 350              | 55                         | 173,655                   | 380               | 11.8                  | 403              | 699                   | 2,574,699                 | 326               | 11.9                  | 303              |
| Asian                      | 53                         | 258,853                   | 246               | 3.6                   | 285              | 30                         | 71,430                    | 504               | 4.9                   | 539              | 202                   | 878,402                   | 276               | 4.0                   | 274              |
| Other                      | 47                         | 138,247                   | 408               | 1.9                   | 540              | 8                          | 30,208                    | 318               | 2.1                   | 451              | 106                   | 431,906                   | 295               | 2.0                   | 385              |
| <b>Education</b>           |                            |                           |                   |                       |                  |                            |                           |                   |                       |                  |                       |                           |                   |                       |                  |
| < High school <sup>6</sup> | 918                        | 1,273,918                 | 865               | 17.8                  | 668              | 182                        | 143,982                   | 1,517             | 9.8                   | 1,054            | 1,787                 | 2,445,987                 | 877               | 11.3                  | 605              |
| High school                | 1,542                      | 5,481,142                 | 338               | 76.6                  | 353              | 449                        | 1,122,649                 | 480               | 76.3                  | 478              | 4,375                 | 16,615,575                | 316               | 76.5                  | 318              |
| Some college               | 26                         | 215,226                   | 145               | 3.0                   | 250              | 23                         | 109,023                   | 253               | 7.4                   | 413              | 142                   | 1,353,342                 | 126               | 6.2                   | 232              |
| ≥ College                  | 20                         | 188,820                   | 127               | 2.6                   | 173              | 28                         | 95,228                    | 353               | 6.5                   | 479              | 142                   | 1,301,342                 | 131               | 6.0                   | 181              |
| <b>Marital status</b>      |                            |                           |                   |                       |                  |                            |                           |                   |                       |                  |                       |                           |                   |                       |                  |
| Never married              | 1,425                      | 3,277,825                 | 522               | 45.8                  | 393              | 426                        | 602,026                   | 849               | 40.9                  | 576              | 3,584                 | 8,609,584                 | 500               | 39.6                  | 342              |
| Currently married          | 1,044                      | 3,683,644                 | 340               | 51.5                  | 463              | 241                        | 795,241                   | 364               | 54.1                  | 533              | 2,680                 | 12,088,680                | 266               | 55.7                  | 375              |

|                          |       |           |     |      |     |     |         |       |      |     |       |           |     |      |     |
|--------------------------|-------|-----------|-----|------|-----|-----|---------|-------|------|-----|-------|-----------|-----|------|-----|
| Previously married       | 37    | 197,637   | 225 | 2.8  | 440 | 15  | 73,615  | 245   | 5.0  | 446 | 182   | 1,017,982 | 215 | 4.7  | 394 |
| <b>Time in service</b>   |       |           |     |      |     |     |         |       |      |     |       |           |     |      |     |
| ≤ 1 year                 | 800   | 1,211,400 | 793 | 16.9 | 578 | 301 | 230,101 | 1,570 | 15.6 | 998 | 2,297 | 3,039,497 | 907 | 14.0 | 668 |
| 2 years                  | 545   | 1,136,945 | 575 | 15.9 | 558 | 133 | 186,533 | 856   | 12.7 | 717 | 1,334 | 2,708,534 | 591 | 12.5 | 527 |
| 3–4 years                | 673   | 1,847,073 | 437 | 25.8 | 450 | 131 | 323,531 | 486   | 22.0 | 474 | 1,473 | 4,607,273 | 384 | 21.2 | 358 |
| 5–10 years               | 409   | 1,720,809 | 285 | 24.0 | 313 | 87  | 394,287 | 265   | 26.8 | 305 | 1,043 | 6,118,843 | 205 | 28.2 | 211 |
| > 10 years               | 79    | 1,242,879 | 76  | 17.4 | 98  | 30  | 336,430 | 107   | 22.9 | 170 | 299   | 5,242,099 | 68  | 24.1 | 97  |
| <b>Deployment status</b> |       |           |     |      |     |     |         |       |      |     |       |           |     |      |     |
| Never deployed           | 1,286 | 2,374,686 | 650 | 33.2 | 498 | 480 | 667,680 | 863   | 45.4 | 579 | 4,117 | 9,254,117 | 534 | 42.6 | 377 |
| Currently deployed       | 262   | 2,053,262 | 153 | 28.7 | 152 | 59  | 304,259 | 233   | 20.7 | 302 | 619   | 4,747,419 | 157 | 21.9 | 181 |
| Previously deployed      | 958   | 2,731,158 | 421 | 38.1 | 576 | 143 | 498,943 | 344   | 33.9 | 714 | 1,710 | 7,714,710 | 266 | 35.5 | 454 |

<sup>1</sup>The sample of enlisted soldiers (n=9,650 cases, 153,523 control person-months) is a subset of the total sample (n=193,617 person-months) from the Army STARRS Historical Administrative Data Study (HADS). Control person-months were assigned a weight of 200 to adjust for under-sampling.

<sup>2</sup>Total includes both cases (i.e., soldiers with a suicide attempt) and control person-months.

<sup>3</sup>Rate per 100,000 person-years, calculated based on  $n_1/n_2$ , where  $n_1$  is the unique number of soldiers within each category and  $n_2$  is the annual number of person-*years*, not person-*months*, in the population (n=3.08 million).

<sup>4</sup>Pop % = percent of the population of enlisted soldier.

<sup>5</sup>SRE = Standardized risk estimates (suicide attempters per 100,000 person-years) were calculated assuming other predictors were at their sample-wide means. SREs were calculated based on logistic regression models that included gender, age at entry into the Army, current age, race/ethnicity, education, marital status, time in service (≤ 1 year, 2 years, 3–4 years, 5–10 years, >10 years), deployment status (never, currently, or previously deployed), and military occupation. The models also included a dummy predictor variable for calendar month and year to control for secular trends.

<sup>6</sup>< High School includes: General Educational Development credential (GED), home study diploma, occupational program certificate, correspondence school diploma, high school certificate of attendance, adult education diploma, and other non-traditional high school credentials.
